# Supplementary material for: A brain-based pain facilitation mechanism contributes to painful diabetic polyneuropathy
Source: PubMed Central journal article supplement (PMC5837628; doi:10.1093/brain/awx337), 2018-01-15
Supplement: brain-2017-01107-file006_awx337.pdf [file brain-2017-01107-file006_awx337.pdf]

|                                      | <b>Painful diabetic neuropathy</b> | <b>Painless diabetic neuropathy</b> | <b>P</b> |
|--------------------------------------|------------------------------------|-------------------------------------|----------|
| <b>Number of participants</b>        | 14                                 | 12                                  |          |
| <b>Age, y</b>                        | 60.5 (54.2-71.9)                   | 63.5 (57.8-73)                      | 0.44     |
| <b>Male</b>                          | 11 (78.6%)                         | 9 (75%)                             | 0.83     |
| <b>HbA1c, %<br/>[mmol/mol]</b>       | 8.3 (7.2-9.3)<br>[67 (55-76)]      | 6.9 (6.3-8.4)<br>[52 (45-68)]       | 0.09     |
| <b>Type 2 diabetes</b>               | 13 (93%)                           | 12 (100%)                           | 0.99     |
| <b>Duration of diabetes, y</b>       | 10 ( 8.4 -14.6)                    | 13.9 (10.6 -21.1)                   | 0.08     |
| <b>BMI, kg/m<sup>2</sup></b>         | 29.2 (27.5 -34.4)                  | 30.5 (27.6-34.4)                    | 0.59     |
| <b>Waist-hip circumference ratio</b> | 0.99 (0.94-1.03)                   | 0.96 (0.88-1.07)                    | 0.46     |
| <b>Ethnicity</b>                     |                                    |                                     |          |
| <b>Caucasian</b>                     | 14 (100%)                          | 12 (100%)                           | 0.99     |

Supplementary table 1

A summary of the key demographic details and blood results of the participants that were scanned in the study (Mann-Whitney U Test; \*p<0.05). Data is shown as the median (intra-quartile range).

|                                                                      | <b>Painful diabetic neuropathy</b> | <b>Painless diabetic neuropathy</b> | <b>P</b> |
|----------------------------------------------------------------------|------------------------------------|-------------------------------------|----------|
| Number of participants                                               | 14                                 | 12                                  |          |
| <b>Analgesic use</b>                                                 |                                    |                                     |          |
| Participants reported analgesic drug use                             | 7                                  | 2                                   | 0.11     |
| Paracetamol                                                          | 3                                  | 0                                   | 0.22     |
| NSAIDS                                                               | 4                                  | 1                                   | 0.33     |
| <b>Antidepressants</b>                                               |                                    |                                     |          |
| Tricyclic Antidepressants (amitriptyline, nortriptyline, imipramine) | 2                                  | 1                                   | 0.99     |
| SNRI (duloxetine)                                                    | 1                                  | 0                                   | 0.99     |
| <b>Gabapentanoids</b>                                                |                                    |                                     |          |
| Gabapentin                                                           | 2                                  | 0                                   | 0.48     |
| Pregabalin                                                           | 2                                  | 1                                   | 0.99     |
| Topical lidocaine patches                                            | 0                                  | 0                                   |          |
| Tramadol                                                             | 0                                  | 0                                   |          |
| <b>Opioids</b>                                                       |                                    |                                     |          |
| Weak (codeine)                                                       | 1                                  | 0                                   | 0.99     |
| Strong (fentanyl patches, oral morphine)                             | 0                                  | 0                                   |          |
| <b>Reported drug use</b>                                             |                                    |                                     |          |
| All oral hypoglycaemic agents                                        | 14                                 | 12                                  |          |
| Metformin                                                            | 12                                 | 11                                  | 0.99     |
| Other Oral hypoglycaemic (Gliclazide)                                | 6                                  | 7                                   | 0.70     |
| Insulin                                                              | 6                                  | 5                                   | 0.99     |
| Other agents (Sitagliptin, Pioglitazone, Exanatide, Linagliptin)     | 3                                  | 4                                   | 0.70     |
| Statin                                                               | 14                                 | 7                                   | < 0.05   |
| Aspirin                                                              | 2                                  | 6                                   | 0.09     |
| <b>Anti-Hypertensives</b>                                            |                                    |                                     |          |
| ACE-I/ARB                                                            | 5                                  | 11                                  | <0.01    |
| Diuretic                                                             | 1                                  | 1                                   | 0.99     |
| B-blocker                                                            | 0                                  | 4                                   | <0.05    |
| Calcium channel blocker                                              | 4                                  | 3                                   | 0.67     |
| Thyroxine                                                            | 1                                  | 0                                   | 0.99     |
| PPI                                                                  | 2                                  | 3                                   | 0.99     |

## Supplementary table 2

A summary of the pharmacotherapy usage for all the participants in the study (NP+: painful diabetic neuropathy; Non-NP: painless diabetic neuropathy). Categorical data were analyzed using the Fischer's exact test (\*p<0.05). Abbreviations: NSAIDS – Non-steroidal anti-inflammatory drugs; SNRI – Serotonin-noradrenergic reuptake inhibitor; ACE-I- Angiotensin converting enzyme inhibition, ARB – Angiotensin receptor blocker; B-blocker – Beta Blocker; PPI – Proton pump inhibitor

|                                   | <b>Painful diabetic neuropathy</b> | <b>Painless diabetic neuropathy</b> | <b>P</b>         |
|-----------------------------------|------------------------------------|-------------------------------------|------------------|
| <b>TCSS Total Score</b>           | 7.5 (5.3-10)                       | 6.5 (3.3-9)                         | 0.49             |
| <b>TCSS Symptom sub-score</b>     | 2 (1.8-3)                          | 1 (0.3-2)                           | <b>&lt; 0.05</b> |
| <b>TCSS Examination sub-score</b> | 5 (2.8-8)                          | 5.5 (2-7.8)                         | 0.94             |
| <b>MRC Sensory Sum Score</b>      | 3.5 (1.5-6.3)                      | 1 (0-3.5)                           | 0.15             |
| <b>IENFD (fibres/mm)</b>          | 1.1 (0.2-1.6)                      | 1.4 (0.1-1.7)                       | 0.40             |
| <b>Sural nerve</b>                |                                    |                                     |                  |
| <b>Amplitude (µV)</b>             | 3.8 (0-5.4)                        | 4.3 (0.4-6.3)                       | 0.74             |
| <b>Conduction velocity (m/s)</b>  | 39.2 (37.6-44.6)                   | 46.4 (40.4-50.8)                    | 0.11             |
| <b>Peroneal nerve</b>             |                                    |                                     |                  |
| <b>Amplitude (mV)</b>             | 2.2 (1.2-3.4)                      | 4.4 (2.9-6.4)                       | <b>&lt; 0.01</b> |
| <b>Conduction velocity (m/s)</b>  | 38.7 (34.8-41.3)                   | 40.9 (37.7-47.1)                    | 0.09             |

Supplementary table 3

A summary of clinical scores, IENFD and electrophysiological recordings from lower limbs for all the participants in the study (NP+: painful diabetic neuropathy; Non-NP: painless diabetic neuropathy). Apart from the TCSS symptom sub-score and peroneal nerve amplitude there were no differences between the two groups. Data is shown as the median (interquartile range) and was analyzed by Mann-Whitney U Test ( $p < 0.05$ ). Significant differences between the groups are in bold. Abbreviations: TCSS – Toronto Clinical Scoring System, MRC- Medical Research Council, IENFD – Intraepidermal nerve fibre density

|                                          | <b>Painful diabetic neuropathy</b> | <b>Painless diabetic neuropathy</b> | <b>P</b>         |
|------------------------------------------|------------------------------------|-------------------------------------|------------------|
| <b>API</b>                               | 4.7 (2.7-6.7)                      | N/A                                 |                  |
| <b>DN4</b>                               | 5 (4-7)                            | 1 (0-2.8)                           | <b>&lt; 0.01</b> |
| <b>painDETECT</b>                        | 14 (8.5-21.5)                      | 1.5 (0-3.5)                         | <b>&lt; 0.01</b> |
| <b>BPI Pain Severity</b>                 | 4.3 (2.6-6)                        | 1.2 (0.1-2)                         | <b>&lt; 0.01</b> |
| <b>NPSI Total</b>                        | 14.3 (9.5-22.3)                    | N/A                                 |                  |
| <b>NPSI Deep Spontaneous Pain</b>        | 0.5 (0-3)                          | N/A                                 |                  |
| <b>NPSI Superficial Spontaneous Pain</b> | 4 (0-7.3)                          | N/A                                 |                  |
| <b>NPSI Evoked Spontaneous Pain</b>      | 1.8 (0-4)                          | N/A                                 |                  |
| <b>NPSI Paraesthesia</b>                 | 5.8 (1.9-9)                        | N/A                                 |                  |
| <b>NPSI Paroxysmal Pain</b>              | 2.8 (0-7.1)                        | N/A                                 |                  |

Supplementary table 4

A summary of the neuropathic pain screening scores (NP+: painful diabetic neuropathy; Non-NP: painless diabetic neuropathy). Data shown as median (interquartile range) and analyzed by Mann-Whitney U Test (\*p<0.05). Significant differences between the groups are in bold. Abbreviations: API – Seven-day pain diary; DN4 - Douleur Neuropathique en 4 Questions; BPI – Brief Pain Inventory; NPSI – Neuropathic Pain Symptom Inventory

|                                     | <b>Painful diabetic neuropathy</b> | <b>Painless diabetic neuropathy</b> | <b>P</b>         |
|-------------------------------------|------------------------------------|-------------------------------------|------------------|
| <b>BPI Pain Interference</b>        | 4.1 (2.4-6.1)                      | 0.3 (0-1.4)                         | <b>&lt; 0.01</b> |
| <b>PCS Rumination</b>               | 3.5 (0.8-10.3)                     | 0 (0-6.3)                           | 0.11             |
| <b>PCS Magnification</b>            | 2.5 (1-4)                          | 1 (0-2)                             | 0.10             |
| <b>PCS Helplessness</b>             | 4 (1.8-12)                         | 0.5 (0-5)                           | <b>&lt; 0.05</b> |
| <b>PCS Total</b>                    | 11 (3.8-24)                        | 3 (0-13.8)                          | <b>&lt; 0.05</b> |
| <b>DAPOS Depression</b>             | 7.5 (5-12.5)                       | 5.5 (5-9.5)                         | 0.22             |
| <b>DAPOS Anxiety</b>                | 3 (3-7)                            | 3 (3-3.75)                          | 0.26             |
| <b>DAPOS Positive Outlook</b>       | 11 (7-13.3)                        | 13 (10-15)                          | 0.21             |
| <b>PASS20 Cognitive</b>             | 6.5 (2.8-11.3)                     | 3 (0-7.8)                           | 0.08             |
| <b>PASS20 Escape-avoidance</b>      | 4.5 (2-9.5)                        | 2.5 (0.3-3.8)                       | 0.06             |
| <b>PASS20 Fear</b>                  | 3 (0.8-7.3)                        | 0 (0-1)                             | <b>&lt; 0.01</b> |
| <b>PASS20 Physiological Anxiety</b> | 1 (0-4)                            | 0                                   | <b>&lt; 0.05</b> |
| <b>PASS Total</b>                   | 14 (7.8-35)                        | 5.5 (2.3-14)                        | <b>&lt; 0.05</b> |
| <b>SAS Symptom Score</b>            | 10.5 (4.5-11.5)                    | 4.5 (2.3-6.8)                       | <b>&lt; 0.05</b> |
| <b>SAS Total Impact Score</b>       | 3 (2-4)                            | 2 (1.3-3)                           | 0.18             |
| <b>ISI Total</b>                    | 16.5 (7.5-18.5)                    | 4 (0-7)                             | <b>&lt; 0.01</b> |
| <b>SF-36 Physical Functioning</b>   | 65 (42.5-90)                       | 85 (57.5-100)                       | 0.12             |
| <b>SF-36 Role Physical</b>          | 87.5 (0-100)                       | 100 (100-100)                       | 0.08             |
| <b>SF-36 Bodily Pain</b>            | 46.5 (28.8-72)                     | 78 (53.8-84)                        | <b>&lt; 0.05</b> |
| <b>SF-36 General Health</b>         | 43.5 (34.3-60.5)                   | 62 (39.5-72)                        | 0.11             |
| <b>SF-36 Vitality</b>               | 40 (20-51.3)                       | 65 (53.8-80)                        | <b>&lt; 0.01</b> |
| <b>SF-36 Social Functioning</b>     | 62.5 (46.9-90.6)                   | 100 (100-100)                       | <b>&lt; 0.01</b> |
| <b>SF-36 Role Emotional</b>         | 100 (33.3-100)                     | 100 (33.3-100)                      | 0.88             |
| <b>SF-36 Mental Health</b>          | 64 (50-77)                         | 84 (64-100)                         | <b>&lt; 0.05</b> |

Supplementary table 5

A summary of the scores for quality life measures, depression, anxiety, insomnia and autonomic symptom abnormalities for all the participants (NP+: painful diabetic neuropathy; Non-NP: painless diabetic neuropathy). All data is presented as the median (interquartile range). Data were analyzed by Mann-Whitney U test (\*p<0.05). Significant differences between the groups are in bold. Abbreviations: BPI – Brief Pain Inventory; DAPOS - Depression, Anxiety, and Positive Outlook Scale; PCS – Pain Catastrophizing Scale; PASS-20 – short form of Pain Anxiety Symptoms Scale; SAS - Survey of Autonomic Symptoms; ISI – Insomnia Severity Index; SF-36 -Short Form 36 of the MOS Outcomes Study
